# Supplementary material for: CDC’s Hospital-Onset Clostridioides difficile Prevention Framework in a Regional Hospital Network
Source: PubMed Central journal article supplement (PMC10973890; doi:10.1001/jamanetworkopen.2024.3846), 2024-03-27
Supplement: jamanetwopen-e243846-s001.pdf [file jamanetwopen-e243846-s001.pdf]

## Supplemental Online Content

Turner NA, Krishnan J, Nelson A, et al. Assessment of CDC's hospital-onset *Clostridioides difficile* prevention framework in a regional hospital network. *JAMA Netw Open*. 2024;7(3):e243846. doi:10.1001/jamanetworkopen.2024.384

**eTable 1.** HO-CDI Prevention Tools and Interventions Deployed, Indexed by Framework Area

**eTable 2.** Overall Relative Changes in Core HO-CDI Prevention Areas by Intervention Site, July 2019-March 2022

**eTable 3.** Time Series Modeling of HO-CDI Incidence Between Intervention Sites and Control Sites With COVID-19 Effect (First Coprimary Analysis), July 2017-March 2022

**eTable 4.** Time Series Modeling of HO-CDI Incidence Between Intervention Sites and Control Sites Across a Range of Statistical Model Specifications and Structures (First Coprimary Analysis), July 2017-March 2022

**eTable 5.** Sensitivity Analysis of Second Coprimary Analysis (Pre- and Postintervention HO-CDI Trends Within Intervention Sites) Accounting for Potential COVID-19 Effect, July 2017-March 2022

**eTable 6.** Sensitivity Analysis of Second Coprimary Analysis (Pre- and Postintervention HO-CDI Trends Within Intervention Sites) Accounting for Varying Statistical Model Structures, July 2019-March 2022

**eTable 7.** Sensitivity Analysis of Second Coprimary Analysis (Pre- and Postintervention HO-CDI Trends Within Intervention Sites) Accounting for Potential COVID-19 Effect, July 2019-March 2022

**eTable 8.** Dose Effect of Framework Intervention Score

**eTable 9.** Association of Individual Framework Prevention Measures With HO-CDI Incidence Rate Trends, July 2019-March 2022

**eFigure 1.** Total Framework Intervention Implementation Score Over Time

**eFigure 2.** Post Hoc Assessment of Study Power Loss due to COVID-19

**eAppendix 1.** Markdown Files from Statistical Analysis in R

**eAppendix 2.** Supplemental Appendix Accessible via Open Science Framework Repository

This supplemental material has been provided by the authors to give readers additional information about their work.

**eTable 1.** HO-CDI Prevention Tools and Interventions Deployed, Indexed by Framework Area

| CDI Prevention Framework Area            | Resources and Interventions                                                                     | Date Deployed |
|------------------------------------------|-------------------------------------------------------------------------------------------------|---------------|
| <b>Isolation and Contact Precautions</b> | 1 Guide: Hand Hygiene                                                                           | 9/2019        |
|                                          | 2 Tools/apps: Hand Hygiene & PPE Audit App                                                      | 10/2019       |
|                                          | 3 Blog: Educating Visitors on PPE Use                                                           | 1/2020        |
|                                          | 4 FAQ: Electronic Monitoring of Hand Hygiene                                                    | 2/2020        |
|                                          | 5 FAQ: Nurse-driven CDI Protocols                                                               | 7/2020        |
|                                          | 6 Dashboard example                                                                             | 6/2021        |
|                                          | 7 Blog: Isolation of Asymptomatic Carriers                                                      | 11/2021       |
| <b>CDI Confirmation</b>                  | 8 Guide: <i>C. difficile</i> Diagnostics (detailed version)                                     | 10/2019       |
|                                          | 9 Guide: <i>C. difficile</i> Diagnostics (short version)                                        | 10/2019       |
|                                          | 10 Rapid Review: Isolation of Asymptomatic Carriers                                             | 10/2019       |
|                                          | 11 FAQ: Multistep <i>C. difficile</i> Testing                                                   | 11/2019       |
|                                          | 12 FAQ: Isolation Guidance for Asymptomatic Carriers                                            | 11/2019       |
|                                          | 13 Blog: Whom to Test                                                                           | 1/2021        |
|                                          | 14 Blog: <i>Clinical Decision Support System; How to encourage smart ordering?</i>              | 4/2022        |
| <b>Environmental Cleaning</b>            | 15 Guide: EVS Cleaning and Auditing                                                             | 8/2019        |
|                                          | 16 Terminal Cleaning Checklist                                                                  | 8/2019        |
|                                          | 17 EVS Supervisor Training                                                                      | 9/2019        |
|                                          | 18 EVS Employee Training                                                                        | 9/2019        |
|                                          | 19 Blog: Evidence for EVS                                                                       | 5/2021        |
|                                          | 20 Blog: <i>C. difficile</i> prevention and a Novel EVS Education Program and intervention plan | 7/2021        |
| <b>Infrastructure</b>                    | 21 Tools/apps: Mini Root Cause Analysis Review Tool                                             | 8/2019        |
|                                          | 22 Tools/apps: Launch of Online CDI Dashboard                                                   | 12/2019       |
|                                          | 23 Tools/apps: (External Resource) PDSA Cycle Handout                                           | 1/2020        |
|                                          | 24 Tools/apps: RCA Report Release                                                               | 12/2020       |
|                                          | 25 Blog: Data Visualization Tips                                                                | 4/2021        |
|                                          | 26 Data visualization article highlight                                                         | 4/2021        |
|                                          | 27 Blog: Cost Effectiveness of CDI Prevention Measures                                          | 4/2021        |
|                                          | 28 Blog: Obstacles and Supports for Implementation                                              | 5/2021        |
| <b>Antibiotic Stewardship</b>            | 29 Urinalysis stewardship toolkit                                                               | 10/2019       |
|                                          | 30 Blog: Ethnography of Antibiotic Decision Making                                              | 2/2020        |
|                                          | 31 Blog: COVID and Stewardship                                                                  | 8/2020        |
|                                          | 32 Blog: Empiric Therapy and COVID                                                              | 8/2020        |
|                                          | 33 Blog: Antibiotic Stewardship                                                                 | 4/2021        |
|                                          | 34 Tools/apps: (External resource) AHQR Antibiotic Time Out Tool                                | 5/2021        |
|                                          | 35 Blog: <i>Asymptomatic Bacterisuputia</i>                                                     | 11/2021       |
|                                          | 36 Blog: <i>Microbiome Therapeutic to reduce recurrence of C difficile</i>                      | 1/2022        |
|                                          | 37 Presentation: <i>UTI: Opportunities for diagnostic Stewardship</i>                           | 3/2022        |
|                                          | 38 Presentation: <i>Pneumonia: Opportunities for stewardship</i>                                | 5/2022        |

**eTable 2.** Overall Relative Changes in Core HO-CDI Prevention Areas by Intervention Site, July 2019-March 2022

|                  | Isolation  | Infrastructure | Confirmation | EVS        | Stewardship | Total       |
|------------------|------------|----------------|--------------|------------|-------------|-------------|
| Augusta          | 0/3 (0)    | 3/8 (0.38)     | 1/7 (0.14)   | 0/3 (0)    | 0/5 (0)     | 4/26 (0.15) |
| Carteret         | 0/3 (0)    | 0/8 (0)        | 3/7 (0.43)   | 2/3 (0.67) | 2/5 (0.40)  | 7/26 (0.27) |
| Central Carolina | 0/3 (0)    | 0/8 (0)        | 1/4 (0.25)   | 0/4 (0)    | 0/6 (0)     | 1/25 (0.04) |
| Chesapeake       | 1/3 (0.33) | 1/8 (0.13)     | 1/5 (0.20)   | 0/3 (0)    | 2/6 (0.33)  | 5/25 (0.20) |
| Duke Raleigh     | 0/3 (0)    | 1/8 (0.13)     | 1/5 (0.20)   | 1/2 (0.50) | 0/5 (0)     | 3/23 (0.13) |
| Duke Regional    | 2/3 (0.67) | 0/8 (0)        | 1/5 (0.20)   | 0/1 (0)    | 0/6 (0)     | 3/23 (0.13) |
| Duke University  | 0/3 (0)    | 1/7 (0.14)     | 1/5 (0.20)   | 1/3 (0.33) | 0/3 (0)     | 3/21 (0.14) |
| Frye             | 0/3 (0)    | 2/8 (0.25)     | 2/6 (0.33)   | 1/2 (0.50) | 0/6 (0)     | 5/25 (0.20) |
| Iredell          | 1/3 (0.33) | 0/8 (0)        | 1/5 (0.20)   | 0/3 (0)    | 0/6 (0)     | 2/25 (0.08) |
| Johnston         | 1/3 (0.33) | 1/8 (0.13)     | 0/5 (0)      | 2/3 (0.67) | 2/5 (.40)   | 6/24 (0.25) |
| Maria Parham     | 0/3 (0)    | 2/8 (0.25)     | 2/5 (0.40)   | 0/3 (0)    | 1/5 (0.20)  | 5/24 (0.21) |
| Nash             | 2/4 (0.50) | 2/8 (0.25)     | 2/5 (0.40)   | 0/3 (0)    | 0/5 (0)     | 6/25 (0.24) |
| Princeton        | 1/4 (0.25) | 1/8 (0.13)     | 1/8 (0.13)   | 0/5 (0)    | 0/5 (0)     | 3/30 (0.10) |
| Rex              | 0/5 (0)    | 2/8 (0.25)     | 3/7 (0.43)   | 0/1 (0)    | 0/5 (0)     | 5/26 (0.19) |
| Sarasota         | 1/4 (0.25) | 2/8 (0.25)     | 0/7 (0)      | 0/1 (0)    | 0/5 (0)     | 3/25 (0.12) |
| Scotland         | 1/3 (0.33) | 0/8 (0)        | 1/7 (0.14)   | 2/4 (0.50) | 1/5 (0.20)  | 5/27 (0.19) |
| Southeastern     | 0/4 (0)    | 1/8 (0.13)     | 0/6 (0)      | 2/5 (0.40) | 1/5 (0.20)  | 4/28 (0.14) |
| SOVAH            | 1/4 (0.25) | 0/7 (0)        | 3/5 (0.60)   | 0/3 (0)    | 2/5 (0.40)  | 6/24 (0.25) |
| Wayne            | 0/4 (0)    | 0/8 (0)        | 1/8 (0.13)   | 0/4 (0)    | 0/5 (0)     | 1/29 (0.03) |
| Wilson           | 0/3 (0)    | 1/8 (0.13)     | 0/4 (0)      | 2/4 (0.50) | 0/5 (0)     | 3/24 (0.13) |

\*Change reported relative to opportunity gaps present at each site (e.g., numerator = number of interventions undertaken during study period; denominator = number of prevention interventions not already implemented at study outset). Total potential prevention interventions per category are: 7 for isolation, 10 for infrastructure, 9 for confirmation, 7 for environmental services (EVS), 6 for stewardship, 39 in total.

**eTable 3.** Time Series Modeling of HO-CDI Incidence Between Intervention Sites and Control Sites With COVID-19 Effect (First Coprimary Analysis), July 2017-March 2022

Model structure:

HO-CDI = Time + Arm + Time x Arm + COVID + Time since COVID + Offset(patient days)

| Parameter                                                  | IRR (95% CI)     | p-value |
|------------------------------------------------------------|------------------|---------|
| Overall time trend                                         | 0.75 (0.56-1.01) | 0.06    |
| Arm, intervention vs control                               | 2.78 (1.10-7.01) | 0.03    |
| Time x arm (test of slope change, intervention vs control) | 0.80 (0.68-0.93) | <0.01   |
| COVID level change                                         | 0.98 (0.76-1.26) | 0.86    |
| COVID trend change                                         | 1.36 (1.01-1.83) | 0.04    |

\*Slope/trend changes expressed per 12-month period

**eTable 4.** Time Series Modeling of HO-CDI Incidence Between Intervention Sites and Control Sites Across a Range of Statistical Model Specifications and Structures (First Coprimary Analysis), July 2017-March 2022

Model structure:

$$\text{HO-CDI} = \text{Time} + \text{Arm} + \text{Time} \times \text{Study Arm} + \text{Offset}(\text{patient days})$$

| Model        | Time             | Arm              | Time x Arm       |
|--------------|------------------|------------------|------------------|
| GEE, ex      | 0.95 (0.89-1.03) | 2.79 (1.10-7.05) | 0.79 (0.67-0.94) |
| GEE, ind     | 0.90 (0.81-1.00) | 2.44 (0.95-6.30) | 0.83 (0.68-1.01) |
| ME, ri       | 0.95 (0.86-1.04) | 3.14 (2.00-4.93) | 0.79 (0.70-0.89) |
| ME, ri, zi   | 0.95 (0.86-1.04) | 3.14 (2.00-4.93) | 0.79 (0.70-0.89) |
| ME, rsri     | 1.02 (0.87-1.19) | 3.00 (1.75-5.15) | 0.82 (0.68-0.99) |
| ME, rsri, zi | 1.02 (0.87-1.19) | 3.00 (1.75-5.15) | 0.82 (0.68-0.99) |

**eTable 5.** Sensitivity Analysis of Second Coprimary Analysis (Pre- and Postintervention HO-CDI Trends Within Intervention Sites) Accounting for Potential COVID-19 Effect, July 2017-March 2022

Model structure:

HO-CDI = Time + Intervention (level change) + Intervention time (slope change) + COVID + Time since COVID + Offset(patient days)

| Parameter                    | IRR (95% CI)     | p-value |
|------------------------------|------------------|---------|
| Baseline trend               | 0.71 (0.63-0.80) | <0.001  |
| Level change                 | 1.21 (0.88-1.64) | 0.24    |
| Slope change                 | 1.19 (0.68-2.08) | 0.55    |
| COVID pandemic, level change | 0.80 (0.52-1.22) | 0.30    |
| COVID pandemic, slope change | 0.97 (0.58-1.64) | 0.92    |

\*Slope/trend changes expressed per 12-month period

**eTable 6.** Sensitivity Analysis of Second Coprimary Analysis (Pre- and Postintervention HO-CDI Trends Within Intervention Sites) Accounting for Varying Statistical Model Structures, July 2019-March 2022

Model structure:

$$\text{HO-CDI} = \text{Time} + \text{Intervention (level change)} + \text{Intervention time (slope change)} + \text{Offset(patient days)}$$

| Model        | Pre-intervention | Intervention, level | Intervention, slope |
|--------------|------------------|---------------------|---------------------|
| GEE, Ex      | 0.76 (0.68-0.85) | 1.12 (0.89-1.42)    | 0.98 (0.77-1.24)    |
| GEE, Ar      | 0.73 (0.64-0.84) | 1.16 (0.81-1.65)    | 1.00 (0.77-1.29)    |
| GEE, Ind     | 0.76 (0.68-0.85) | 1.12 (0.88-1.42)    | 0.98 (0.77-1.24)    |
| ME, RI       | 0.76 (0.70-0.82) | 1.12 (0.98-1.30)    | 0.98 (0.88-1.09)    |
| ME, RI, ZI   | 0.76 (0.70-0.82) | 1.12 (0.98-1.29)    | 0.98 (0.88-1.09)    |
| ME, RSRI     | 0.74 (0.67-0.83) | 0.99 (0.98-1.00)    | 0.94 (0.84-1.04)    |
| ME, RSRI, ZI | 0.74 (0.67-0.83) | 1.11 (0.96-1.27)    | 0.94 (0.84-1.04)    |

GEE = generalized estimating equation

ME = mixed effects

Ex = exchangeable correlation structure

Ar = autoregressive correlation structure

Ind = independent correlation structure

RI = random intercept

ZI = zero inflation

RSRI = random slope, random intercept

**eTable 7.** Sensitivity Analysis of Second Coprimary Analysis (Pre- and Postintervention HO-CDI Trends Within Intervention Sites) Accounting for Potential COVID-19 Effect, July 2019-March 2022

Model structure:

HO-CDI = Time + Intervention (level change) + Intervention time (slope change) + Offset(patient days)

| Model | Lag (months) | Pre-intervention | Intervention, level | Intervention, slope |
|-------|--------------|------------------|---------------------|---------------------|
| GEE   | 0            | 0.75 (0.67-0.83) | 1.15 (0.92-1.42)    | 0.99 (0.78-1.26)    |
| GEE   | 1            | 0.76 (0.68-0.85) | 1.12 (0.88-1.42)    | 0.98 (0.77-1.24)    |
| GEE   | 2            | 0.78 (0.70-0.87) | 1.05 (0.86-1.28)    | 0.97 (0.77-1.22)    |
| GEE   | 3            | 0.79 (0.70-0.88) | 1.02 (0.81-1.28)    | 0.97 (0.77-1.22)    |



**eTable 8.** Dose Effect of Framework Intervention Score

| Modeling Approach      | Parameter                                       | IRR (95% CI)     |
|------------------------|-------------------------------------------------|------------------|
| Intervention Score     | Time (baseline trend)                           | 0.81 (0.68-0.97) |
|                        | Total intervention score                        | 0.95 (0.90-0.99) |
| Intervention Quintiles | Time x quintile (slope change test by quintile) | 0.89 (0.83-0.95) |

\*Slope/trend changes expressed per 12-month period

**eTable 9.** Relative Impact of Individual Framework Prevention Measures on HO-CDI Incidence Rate Trends, July 2019-March 2022

General model structure (note that level and slope changes are included for each specific intervention listed below):

$$\text{HO-CDI} = \text{Time} + \text{Intervention (level change)} + \text{Intervention time (slope change)} + \text{Offset(patient days)}$$

| Model                     | Parameter                           | Yearly IRR (95% CI) |
|---------------------------|-------------------------------------|---------------------|
| Full model <sup>a</sup>   | Baseline trend                      | 1.03 (0.89-1.19)    |
|                           | Isolation auditing, level           | 0.94 (0.74-1.19)    |
|                           | Isolation auditing, slope           | 1.07 (0.91-1.26)    |
|                           | Case reviews, level                 | 1.25 (0.97-1.61)    |
|                           | Case reviews, slope                 | 0.90 (0.79-1.03)    |
|                           | Two-step testing, level             | 0.54 (0.48-0.61)*   |
|                           | EVS audits, level                   | 1.33 (0.99-1.78)    |
|                           | EVS audits, slope                   | 1.06 (0.92-1.21)    |
|                           | Terminal clean, level               | 1.68 (1.23-2.29)*   |
|                           | Terminal clean, slope               | 0.82 (0.72-0.93)*   |
|                           | Stewardship durations, level        | 1.01 (0.63-1.61)    |
|                           | Stewardship durations, slope        | 0.89 (0.72-1.09)    |
|                           | Stewardship, high yield, level      | 0.59 (0.47-0.76)*   |
|                           | Stewardship, high yield, slope      | 0.87 (0.71-1.07)    |
|                           | Stewardship, fluoroquinolone, level | 0.48 (0.25-0.93)*   |
|                           | Stewardship, fluoroquinolone, slope | 1.04 (0.66-1.64)    |
|                           | Limited model <sup>b</sup>          | Baseline trend      |
| Isolation auditing, slope |                                     | 1.13 (0.94-1.34)    |
| Case reviews, slope       |                                     | 0.81 (0.68-0.96)*   |
| Two-step testing, level   |                                     | 0.50 (0.42-0.59)*   |
| EVS audits                |                                     | 1.12 (0.95-1.32)    |
| Stewardship, high yield   |                                     | 0.77 (0.60-0.99)*   |

<sup>a</sup>Full model included all prevention measures undertaken by at least 2 hospitals. Main model outcome was HO-CDI incidence.

<sup>b</sup>Limited model included only prevention measures undertaken by at least 2 hospitals with at least 6 months of time accrued before and after each intervention

\*Delineates effect estimates with a 95% CI that does not cross 1.0

**eFigure 1.** Total Framework Intervention Implementation Score Over Time

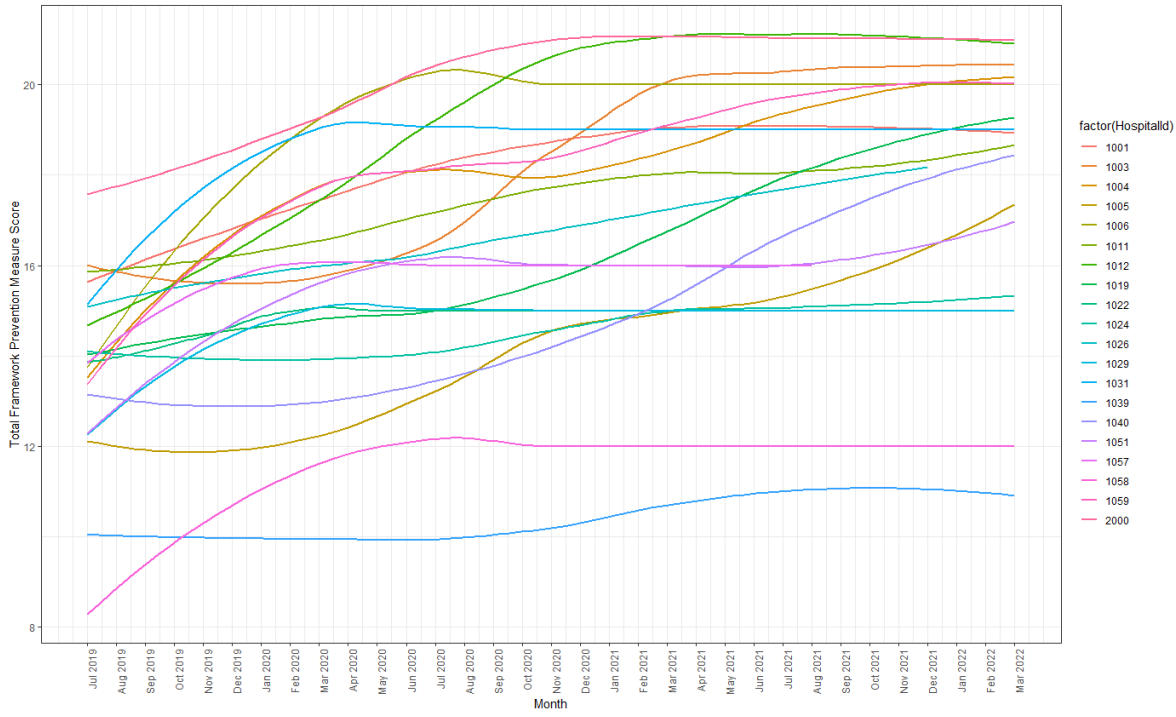

**eFigure 2.** Post Hoc Assessment of Study Power Loss due to COVID-19

To assess effect of COVID-19 pandemic on study power, we used pre-pandemic trends in intervention implementation (baseline slope trend from Figure 3 in main text) to estimate intervention implementation by study close in March 2022 assuming pre-pandemic trends were sustained. We then created a hypothetical data table in which sites' intervention rates increased in accordance with these pre-pandemic trends. We then used this hypothetical data table to provide inputs for the model associating intervention score with HO-CDI incidence rates (as in Table 2 in the main text).

The solid line represents modeled median HO-CDI rates across participating sites as observed in actual study. The dashed line represents modeled median HO-CDI rates across participating sites using:

- 1) Projected trends in interventions absent the COVID-19 pandemic (based on main manuscript, **Figure 3**)
- 2) Estimated intervention effects (based on main manuscript **Table 3**).

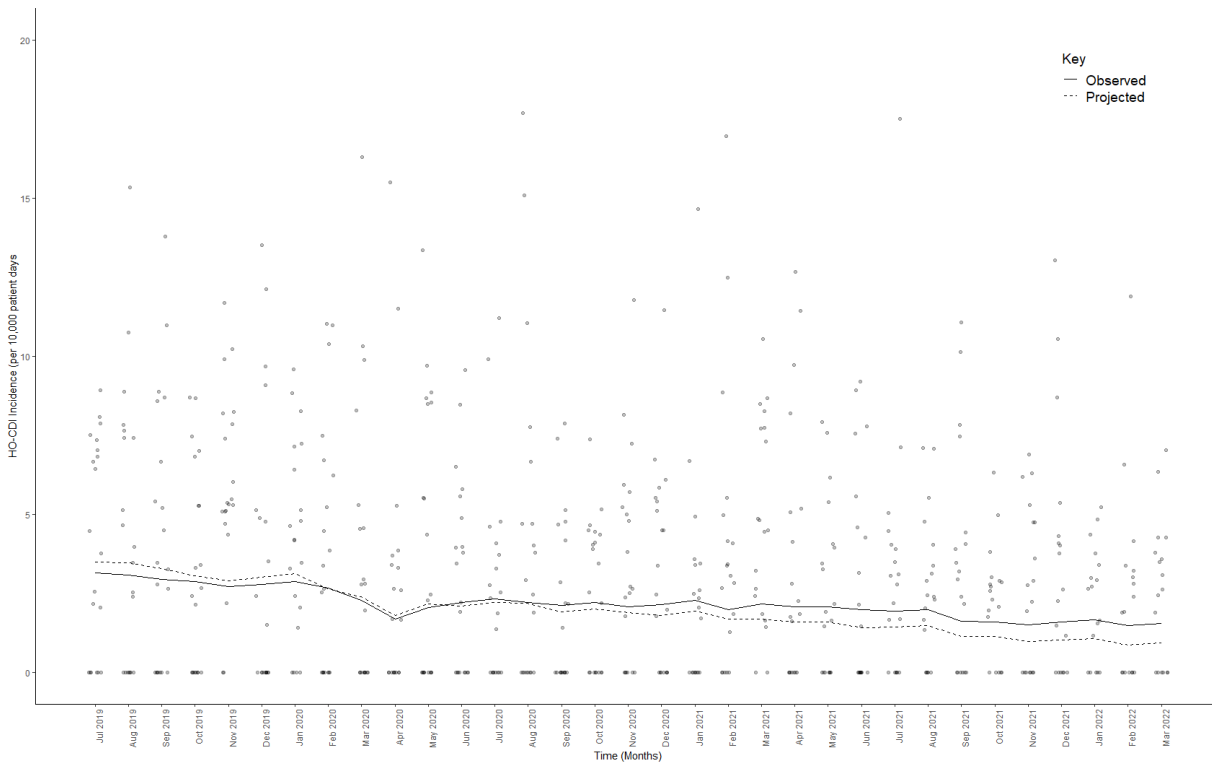

# eAppendix. Markdown Files from Statistical Analysis in R

Analyst: Nicholas Turner, MD, MHSc

Edition: 27 June 2023

## Barplot of Missingness by Variable:

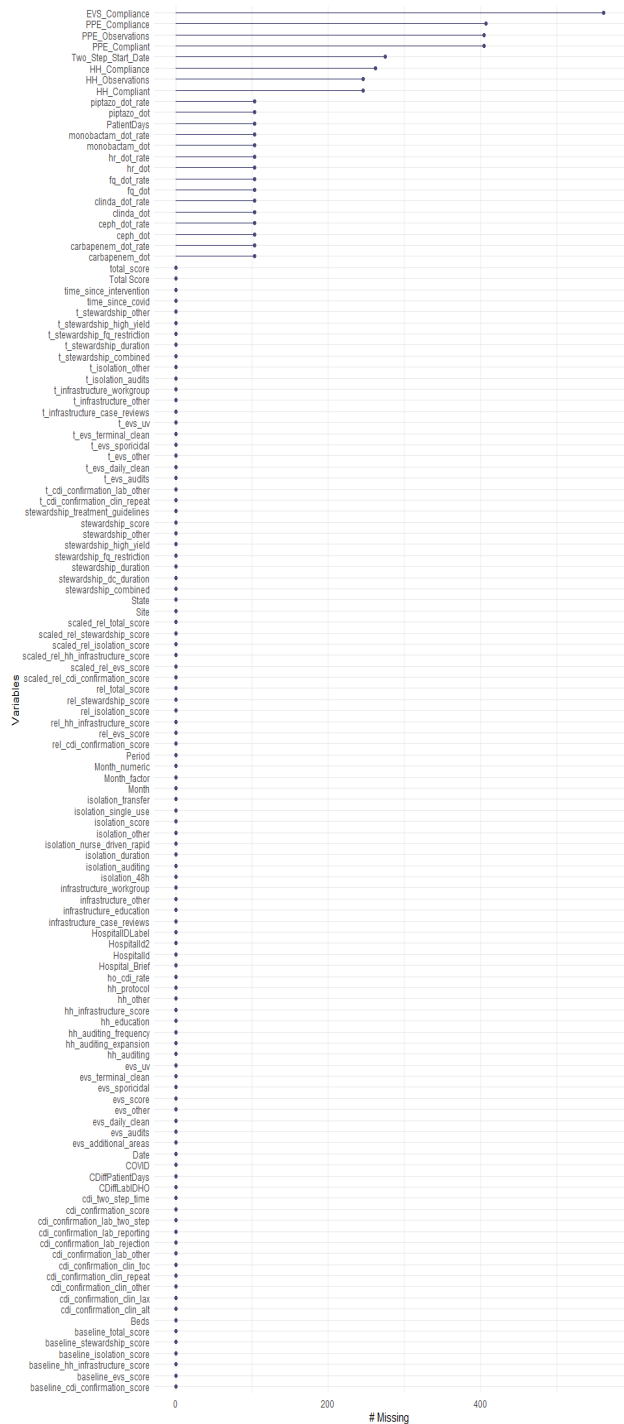

# Heat map of missing data:

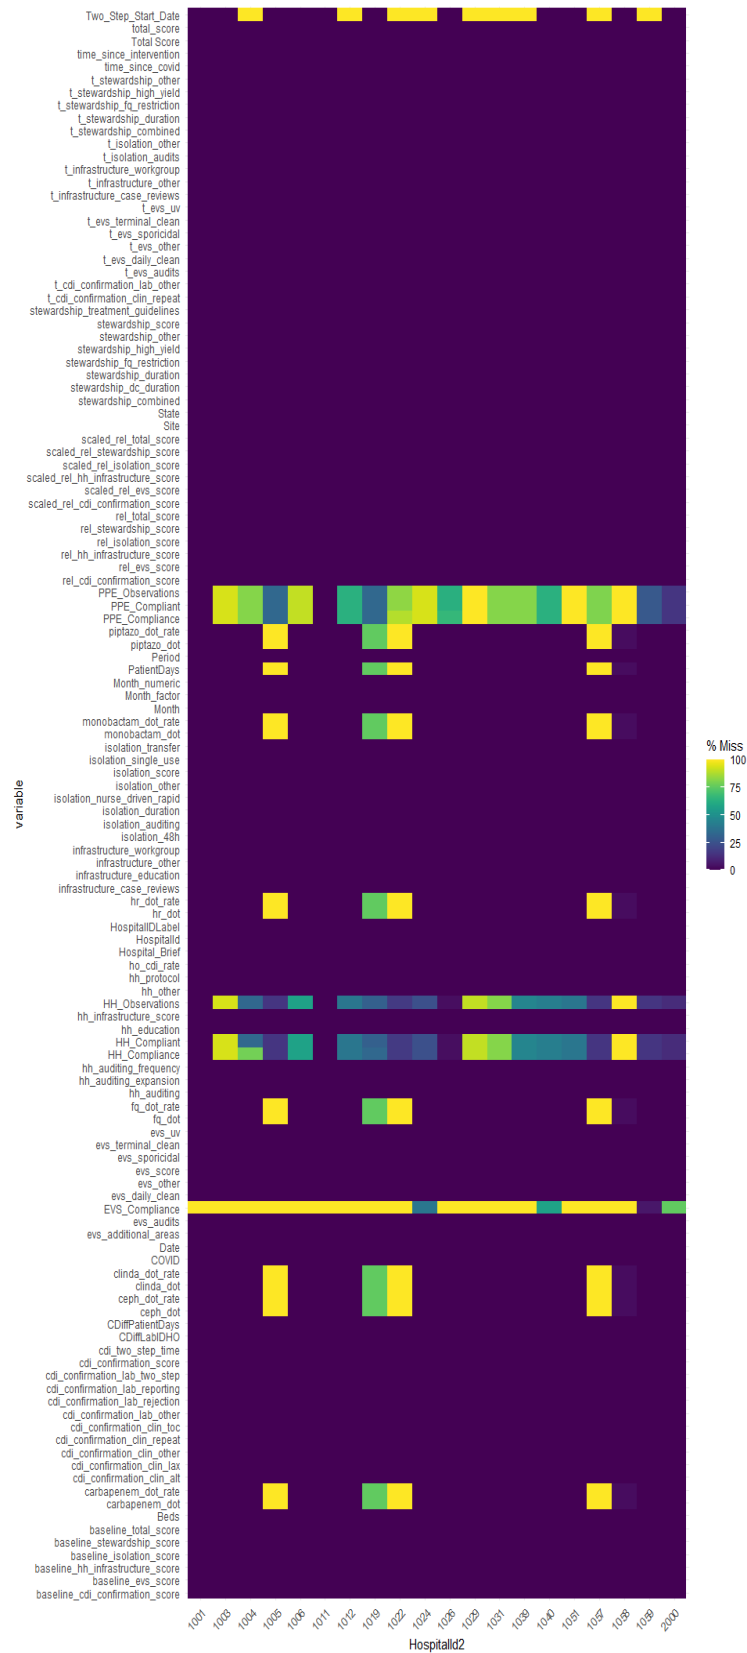

## QQ Plot for Poisson Distribution Check

```
poisson <- fitdistr(cohort$ho_cdi_rate, "Poisson")  
qqp(cohort$ho_cdi_rate, "pois", poisson$estimate, lambda=3.3)
```

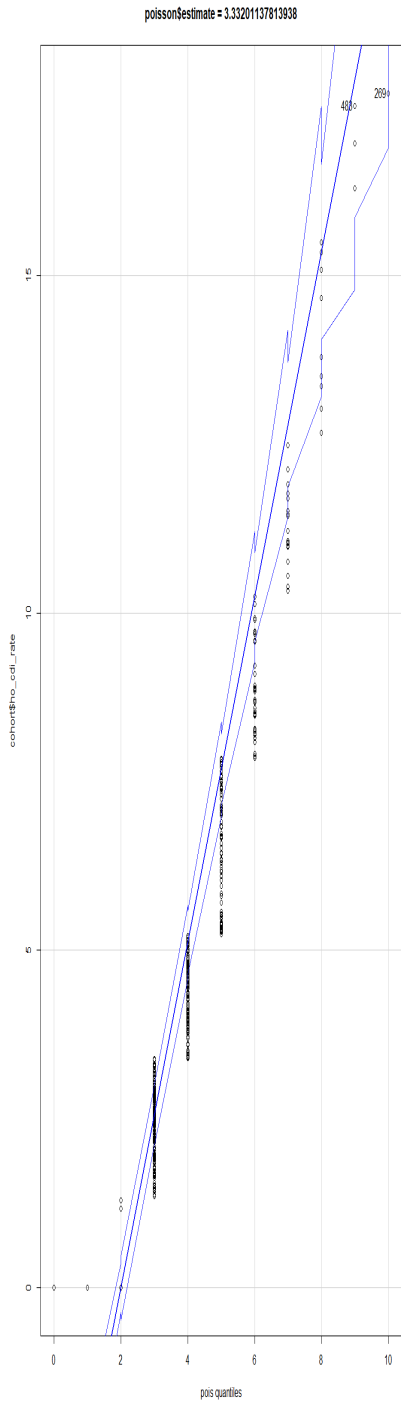

## Primary Analysis

Coprimary analysis 1, contributing to Figure 1 in main text:

```
# GEE Modeling
gee_internal_ex <- geepack::geeglm(CDiffLabIDHO ~ month_numeric*Arm + offset(log(CDiffPatientDays)), id = factor(HospitalId), family="poisson", corstr = "exchangeable", waves=month_numeric, data=cdi)

summary(gee_internal_ex)

##
## Call:
## geepack::geeglm(formula = CDiffLabIDHO ~ month_numeric * Arm +
##   offset(log(CDiffPatientDays)), family = "poisson", data = cdi,
##   id = factor(HospitalId), waves = month_numeric, corstr = "exchangeable")
##
## Coefficients:
##              Estimate      Std.err    Wald Pr(>|W|)
## (Intercept)   -8.402737    0.442846 360.028 < 2e-16 ***
## month_numeric -0.003950    0.003194   1.529  0.21622
## ArmIntervention  1.024965    0.473421   4.687  0.03039 *
## month_numeric:ArmIntervention -0.019633    0.007157   7.526  0.00608 **
## ---
## Signif. codes:  0 '***' 0.001 '**' 0.01 '*' 0.05 '.' 0.1 ' ' 1
##
## Correlation structure = exchangeable
## Estimated Scale Parameters:
##
##              Estimate Std.err
## (Intercept)   1.904  0.2451
## Link = identity
##
## Estimated Correlation Parameters:
##              Estimate Std.err
## alpha    0.4577  0.1031
## Number of clusters: 46 Maximum cluster size: 33

gee_internal_ex_outputs <- tidy(gee_internal_ex, conf.int=TRUE, conf.level=0.95) %>%
  mutate(IRR=exp(estimate),
         LL=exp(conf.low),
         UL=exp(conf.high),
         ann_IRR=exp(12*estimate),
         ann_LL=exp(12*conf.low),
         ann_UL=exp(12*conf.high))

kable(gee_internal_ex_outputs)
```

| term          | estimate | std.error | statistic | p.value | conf.low | conf.high | IRR    | LL     | UL     | ann_IRR   | ann_L  | ann_UL    |
|---------------|----------|-----------|-----------|---------|----------|-----------|--------|--------|--------|-----------|--------|-----------|
| (Intercept)   | -8.4027  | 0.4428    | 360.028   | 0.0000  | -9.2707  | -7.5348   | 0.0002 | 0.0001 | 0.0005 | 0.000e+00 | 0.0000 | 0.000e+00 |
| month_numeric | -0.0040  | 0.0032    | 1.529     | 0.2162  | -0.0102  | 0.0023    | 0.9961 | 0.9898 | 1.0023 | 9.537e-01 | 0.8847 | 1.028e+00 |



| term                          | estimate | std.error | statistic | p.value | conf.low | conf.high | IRR    | LL     | UL     | ann_IRR   | ann_LL | ann_UL    |
|-------------------------------|----------|-----------|-----------|---------|----------|-----------|--------|--------|--------|-----------|--------|-----------|
| ArmIntervention               | 1.0250   | 0.4734    | 4.687     | 0.0304  | 0.0971   | 1.9529    | 2.7870 | 1.1019 | 7.0488 | 2.196e+05 | 3.2057 | 1.504e+10 |
| month_numeric:ArmIntervention | -0.0196  | 0.0072    | 7.526     | 0.0061  | -0.0337  | -0.0056   | 0.9806 | 0.9669 | 0.9944 | 7.901e-01 | 0.6677 | 9.349e-01 |

### Copriary analysis 2, contributing to Figure 2

```
gee_internal_ind <- geepack::geeglm(CDiffLabIDHO ~ month_numeric + intervention + t_intervention + offset(log(CDiffPatientDays)), id = factor(HospitalId), family="poisson", corstr = "independence", waves=month_numeric, data=cdi)
```

```
summary(gee_internal_ind)
```

```
##
## Call:
## geepack::geeglm(formula = CDiffLabIDHO ~ month_numeric + intervention +
##   t_intervention + offset(log(CDiffPatientDays)), family = "poisson",
##   data = cdi, id = factor(HospitalId), waves = month_numeric,
##   corstr = "independence")
##
## Coefficients:
##      Estimate Std. err   Wald Pr(>|W|)
## (Intercept)  -6.99822  0.06962 10105.03 < 2e-16 ***
## month_numeric -0.02297  0.00460   24.89 6.1e-07 ***
## intervention   0.11366  0.12178    0.87  0.35
## t_intervention -0.00176  0.01002    0.03  0.86
## ---
## Signif. codes:  0 '***' 0.001 '**' 0.01 '*' 0.05 '.' 0.1 ' ' 1
##
## Correlation structure = independence
## Estimated Scale Parameters:
##
##      Estimate Std. err
## (Intercept)   1.3   0.176
## Number of clusters: 20 Maximum cluster size: 57
##
gee_internal_outputs <- tidy(gee_internal_ind, conf.int=TRUE, conf.level=0.95) %>%
  mutate(IRR=exp(estimate),
         LL=exp(conf.low),
         UL=exp(conf.high),
         ann_IRR=exp(12*estimate),
         ann_LL=exp(12*conf.low),
         ann_UL=exp(12*conf.high))
```

```
kable(gee_internal_outputs)
```

| term           | estimate | std.error | statistic | p.value | conf.low | conf.high | IRR   | LL    | UL    | ann_IRR | ann_LL | ann_UL |
|----------------|----------|-----------|-----------|---------|----------|-----------|-------|-------|-------|---------|--------|--------|
| (Intercept)    | -6.998   | 0.070     | 1.01e+04  | 0.000   | -7.135   | -6.862    | 0.001 | 0.001 | 0.001 | 0.000   | 0.000  | 0.000  |
| month_numeric  | -0.023   | 0.005     | 2.49e+01  | 0.000   | -0.032   | -0.014    | 0.977 | 0.969 | 0.986 | 0.759   | 0.681  | 0.846  |
| intervention   | 0.114    | 0.122     | 8.71e-01  | 0.351   | -0.125   | 0.352     | 1.120 | 0.882 | 1.422 | 3.912   | 0.223  | 68.596 |
| t_intervention | -0.002   | 0.010     | 3.10e-02  | 0.860   | -0.021   | 0.018     | 0.998 | 0.979 | 1.018 | 0.979   | 0.774  | 1.239  |

**eAppendix 2.** Supplemental Appendix Accessible via Open Science Framework Repository

<https://doi.org/10.17605/OSF.IO/Z3SMV>
