# Supplementary material for: CDC’s Hospital-Onset Clostridioides difficile Prevention Framework in a Regional Hospital Network
Source: PubMed Central journal article supplement (PMC10973890; doi:10.1001/jamanetworkopen.2024.3846), 2024-03-27
Supplement: jamanetwopen-e243846-s002.pdf [file jamanetwopen-e243846-s002.pdf]

## Data Sharing Statement

Turner. Assessment of CDC's Hospital-Onset *Clostridioides difficile* Prevention Framework in a Regional Hospital Network. *JAMA Netw Open*. Published March 27, 2024.

doi:10.1001/jamanetworkopen.2024.3846

### Data

**Data available:** No

### Additional Information

**Explanation for why data not available:** Markdown files including summary data can be made available upon request; not IRB approved to release any data which could include individual identifying information
